# Supplementary material for: Room-temperature phosphorescence of manganese-based metal halides
Source: Royal Society of Chemistry journal article supplement (doi:10.1039/d1dt03206b), 2021-01-01
Supplement: d1dt03206b1.pdf [file d1dt03206b1.pdf]

## Supplementary information for

# Room-temperature phosphorescence of manganese-based metal halides

Yue Zhang,<sup>a</sup> Dian Chen,<sup>a</sup> Kai-Hang Jin,<sup>a</sup> Shuang-Quan Zang,<sup>b,\*</sup> Qing-Lun Wang<sup>a,\*</sup>

<sup>a</sup>College of Chemistry, Key Laboratory of Advanced Energy Materials Chemistry (Ministry of Education), Nankai University, Tianjin, 300071, P. R. China. E-mail address: wangql@nankai.edu.cn (Q.-L. Wang)

<sup>b</sup>College of Chemistry and Molecular Engineering, Zhengzhou University, Zhengzhou 450001, P. R. China. E-mail address: zangsqzg@zzu.edu.cn (S.-Q.Zang).

### Theoretical calculation:

To evaluate the distortion of the inorganic octahedron, the following equations for the degree of distortion and bond were used:

$$\Delta d = \frac{1}{6} \sum_{n=1}^6 \frac{(d_n - d)^2}{d}$$

$$\sigma^2 = \frac{1}{11} \sum_{n=1}^{12} (\theta_n - 90^\circ)^2$$

Where  $\theta_n$  is the X–M–X bond angle,  $d_n$  is the M–X bond length, and  $d$  is the average value of the M–X bond distances.

### References

1. W. Baur, *Acta Crystallogr., Sect. B: Struct. Crystallogr. Cryst. Chem.*, 1974, **30**, 1195–1215.
2. K. Robinson, G. V. Gibbs and P. H. Ribbe, *Science.*, 1971, **172**, 567.
3. H.-P. Lu, C.-X. Xiao, R.-Y. Song, T.-Y. Li, A. E. Maughan, A. Levin, R. Brunecky, J. J. Berry, D. B. Mitzi, V. Blum and M. C. Beard, *J. Am. Chem. Soc.*, 2020, **142**, 13030–13040.
4. Z.-Z. Zhang, J.-C. Jin, L.-K. Gong, Y.-P. Lin, K.-Z. Du and X.-Y. Huang, *Dalton Trans.*, 2021, **50**, 3586–3592
5. M.-Y. Li, J.-W. Lin, K.-J. Liu, L.-b. Fan, N. Wang, Z.-N. Guo, W.-X. Yuan, J. Zhao, and Q.-L. Liu, *Inorg. Chem.*, 2021, **60**, 11429–11434

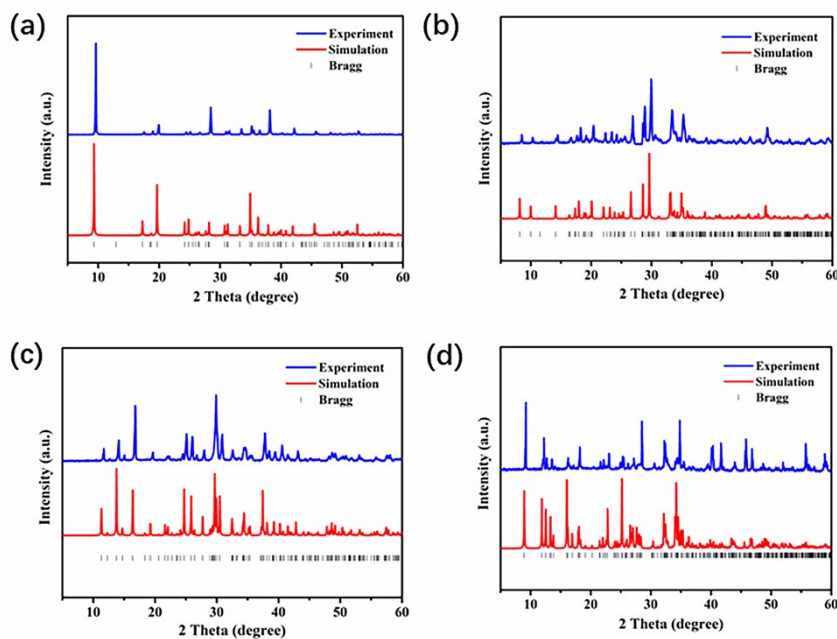

**Fig. S1** (a) The simulated and experimental PXRD pattern of  $\{[H_2DAP]MnCl_4\}_n$  (**1**); (b) The simulated and experimental PXRD pattern of  $\{[(H_2MELA)_2MnCl_5]Cl\}_n$  (**2**); (c) The simulated and experimental PXRD pattern of  $[H_2TAP]_2MnCl_6$  (**3**); (d) The simulated and experimental PXRD pattern of  $[H_2MXD]_2MnCl_6$  (**4**).

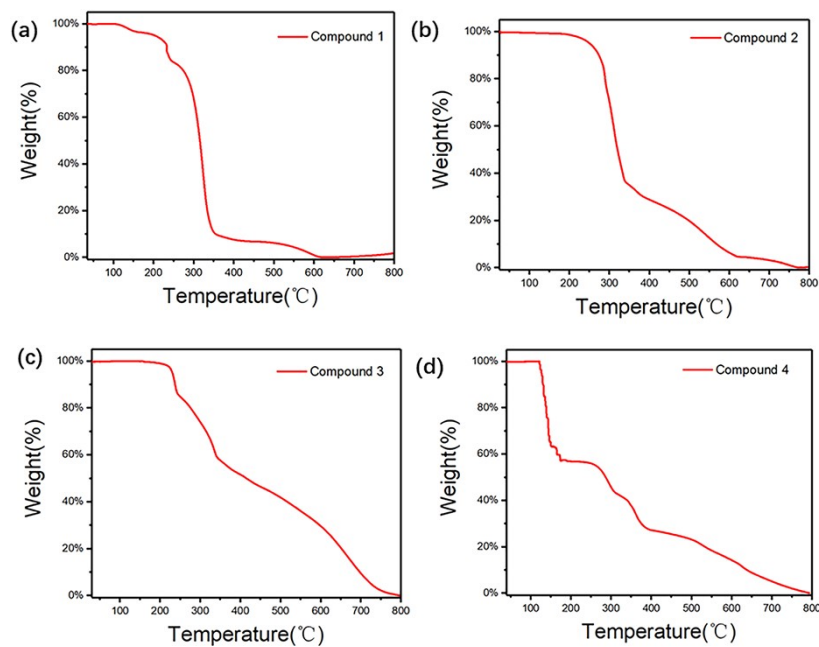

**Fig. S2** (a) The thermogravimetric analysis of  $\{[H_2DAP]MnCl_4\}_n$  (**1**); (b) The thermogravimetric analysis of  $\{[(H_2MELA)_2MnCl_5]Cl\}_n$  (**2**); (c) The thermogravimetric analysis of  $[H_2TAP]_2MnCl_6$  (**3**); (d) The thermogravimetric analysis of  $[H_2MXD]_2MnCl_6$  (**4**).

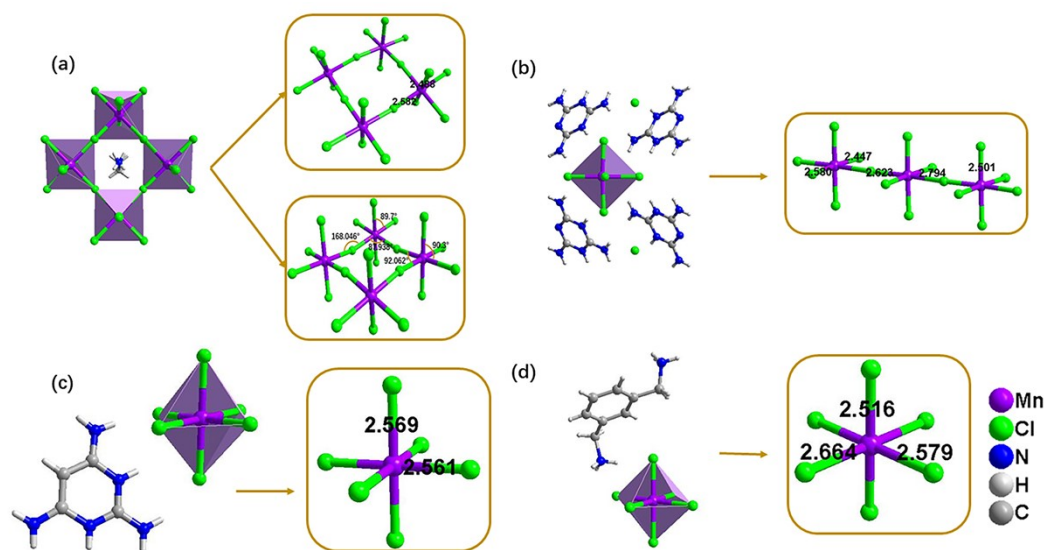

**Fig. S3** (a) The smallest asymmetric unit of  $\{[H_2DAP]MnCl_4\}_n$  (**1**), as well as the bond length and bond angle; (b) The smallest asymmetric unit of  $\{[(H_2MELA)_2MnCl_5]Cl\}_n$  (**2**) and the bond length; (c) The smallest asymmetric unit of  $[H_2TAP]_2MnCl_6$  (**3**) and the bond length; (d) The smallest asymmetric unit of  $[H_2MXD]_2MnCl_6$  (**4**) and the bond length.

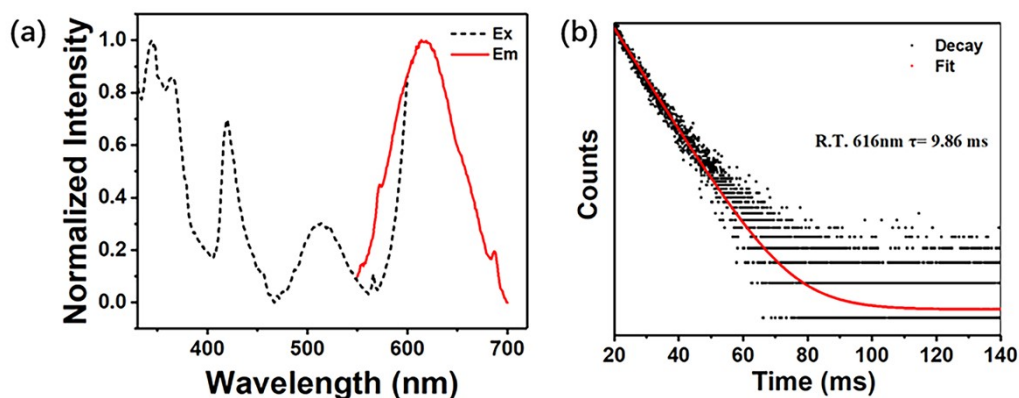

**Fig. S4** (a) Excitation and emission spectra of  $\{[(H_2MELA)_2MnCl_5]Cl\}_n$  (**2**); (b) Decay and fitted curve at room temperature with emission at  $\lambda_{em} = 616$  nm of  $\{[(H_2MELA)_2MnCl_5]Cl\}_n$  (**2**).  $\tau$  is equivalent to the lifetime.

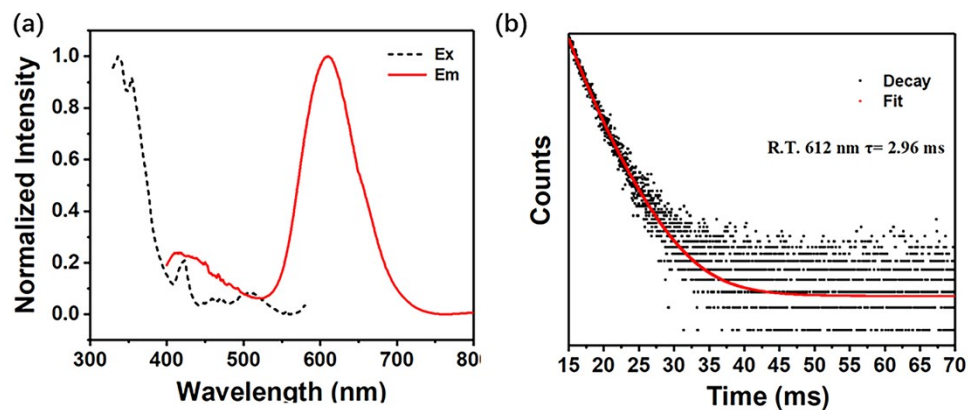

**Fig. S5** (a) Excitation and emission spectra of  $[\text{H}_2\text{TAP}]_2\text{MnCl}_6$  (**3**); (b) Decay and fitted curve at room temperature with emission at  $\lambda_{\text{em}} = 612$  nm of  $[\text{H}_2\text{TAP}]_2\text{MnCl}_6$  (**3**).  $\tau$  is equivalent to the lifetime.

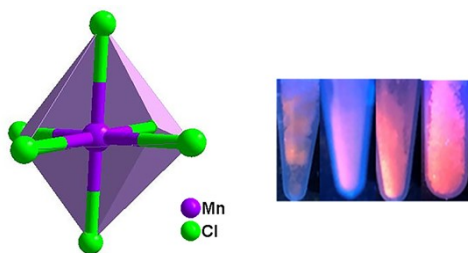

**Fig. S6** Comparison of luminescence intensity of  $\{[\text{H}_2\text{DAP}]\text{MnCl}_4\}_n$  (**1**),  $\{[(\text{H}_2\text{MELA})_2\text{MnCl}_5]\text{Cl}\}_n$  (**2**),  $[\text{H}_2\text{TAP}]_2\text{MnCl}_6$  (**3**) and  $[\text{H}_2\text{MXD}]_2\text{MnCl}_6$  (**4**) at the same excitation wavelength.

**Table S1** Crystallographic parameters of {[H<sub>2</sub>DAP]MnCl<sub>4</sub>}<sub>n</sub> (**1**) and {[H<sub>2</sub>MELA)<sub>2</sub>MnCl<sub>5</sub>]Cl}<sub>n</sub> (**2**)

|                                                              | {[H <sub>2</sub> DAP]MnCl <sub>4</sub> } <sub>n</sub> ( <b>1</b> )     | {[H <sub>2</sub> MELA) <sub>2</sub> MnCl <sub>5</sub> ]Cl} <sub>n</sub> ( <b>2</b> ) |
|--------------------------------------------------------------|------------------------------------------------------------------------|--------------------------------------------------------------------------------------|
| Empirical formula                                            | C <sub>3</sub> H <sub>12</sub> Cl <sub>4</sub> MnN <sub>2</sub>        | C <sub>6</sub> H <sub>16</sub> Cl <sub>6</sub> MnN <sub>12</sub>                     |
| Formula weight                                               | 272.89                                                                 | 523.95                                                                               |
| Temperature/K                                                | 293(2)                                                                 | 293(2)                                                                               |
| Crystal system                                               | orthorhombic                                                           | monoclinic                                                                           |
| Space group                                                  | <i>Imma</i>                                                            | <i>P2<sub>1</sub>/m</i>                                                              |
| <i>a</i> /Å                                                  | 7.1701(9)                                                              | 5.40460(10)                                                                          |
| <i>b</i> /Å                                                  | 18.986(2)                                                              | 15.3969(4)                                                                           |
| <i>c</i> /Å                                                  | 7.3547(8)                                                              | 10.8565(3)                                                                           |
| <i>α</i> /°                                                  | 90                                                                     | 90                                                                                   |
| <i>β</i> /°                                                  | 90                                                                     | 93.166(2)                                                                            |
| <i>γ</i> /°                                                  | 90                                                                     | 90                                                                                   |
| Volume/Å <sup>3</sup>                                        | 1001.2(2)                                                              | 902.03(4)                                                                            |
| <i>Z</i>                                                     | 4                                                                      | 2                                                                                    |
| $\rho_{\text{calc}}$ /cm <sup>3</sup>                        | 1.810                                                                  | 1.929                                                                                |
| $\mu$ /mm <sup>-1</sup>                                      | 20.050                                                                 | 14.338                                                                               |
| <i>F</i> (000)                                               | 548.0                                                                  | 526.0                                                                                |
| Crystal size/mm <sup>3</sup>                                 | 0.03 × 0.03 × 0.02                                                     | 0.06 × 0.06 × 0.05                                                                   |
| Radiation                                                    | CuK $\alpha$ ( $\lambda$ = 1.54184)                                    | CuK $\alpha$ ( $\lambda$ = 1.54184)                                                  |
| 2 $\theta$ range for data collection/°                       | 9.316 to 129.878                                                       | 8.156 to 147.708                                                                     |
| Reflections collected                                        | 1344                                                                   | 4101                                                                                 |
| Independent reflections                                      | 481 [ <i>R</i> <sub>int</sub> = 0.0799]                                | 1849 [ <i>R</i> <sub>int</sub> = 0.0424]                                             |
| Data/restraints/parameters                                   | 481/0/33                                                               | 1849/0/121                                                                           |
| Goodness-of-fit on <i>F</i> <sup>2</sup>                     | 1.113                                                                  | 1.137                                                                                |
| Final <i>R</i> indexes [ <i>I</i> ≥ 2 $\sigma$ ( <i>I</i> )] | <i>R</i> <sub><i>I</i></sub> = 0.0654, <i>wR</i> <sub>2</sub> = 0.1586 | <i>R</i> <sub><i>I</i></sub> = 0.0576, <i>wR</i> <sub>2</sub> = 0.1676               |
| Final <i>R</i> indexes [all data]                            | <i>R</i> <sub><i>I</i></sub> = 0.0666, <i>wR</i> <sub>2</sub> = 0.1596 | <i>R</i> <sub><i>I</i></sub> = 0.0611, <i>wR</i> <sub>2</sub> = 0.1694               |
| Largest diff. peak/hole / e Å <sup>-3</sup>                  | 1.10/-0.55                                                             | 1.00/-0.85                                                                           |

$$R_1 = \frac{\sum ||F_o| - |F_c||}{\sum |F_o|}, wR_2 = \left[ \frac{\sum w(F_o^2 - F_c^2)^2}{\sum w(F_o^2)^2} \right]^{1/2}$$

**Table S2** Crystallographic parameters of [H<sub>2</sub>TAP]<sub>2</sub>MnCl<sub>6</sub> (**3**) and [H<sub>2</sub>MXD]<sub>2</sub>MnCl<sub>6</sub> (**4**)

|                                                               | [H <sub>2</sub> TAP] <sub>2</sub> MnCl <sub>6</sub>              | [H <sub>2</sub> MXD] <sub>2</sub> MnCl <sub>6</sub>              |
|---------------------------------------------------------------|------------------------------------------------------------------|------------------------------------------------------------------|
| Empirical formula                                             | C <sub>8</sub> H <sub>18</sub> Cl <sub>6</sub> MnN <sub>10</sub> | C <sub>16</sub> H <sub>28</sub> Cl <sub>6</sub> MnN <sub>4</sub> |
| Formula weight                                                | 521.96                                                           | 544.06                                                           |
| Temperature/K                                                 | 200.00(10)                                                       | 296.6(6)                                                         |
| Crystal system                                                | monoclinic                                                       | triclinic                                                        |
| Space group                                                   | <i>I</i> 2/ <i>m</i>                                             | <i>P</i> -1                                                      |
| <i>a</i> /Å                                                   | 8.9461(3)                                                        | 7.5206(3)                                                        |
| <i>b</i> /Å                                                   | 9.6604(3)                                                        | 8.4873(3)                                                        |
| <i>c</i> /Å                                                   | 11.2084(3)                                                       | 10.5291(3)                                                       |
| <i>α</i> /°                                                   | 90                                                               | 101.991(3)                                                       |
| <i>β</i> /°                                                   | 105.229(3)                                                       | 99.889(3)                                                        |
| <i>γ</i> /°                                                   | 90                                                               | 112.943(3)                                                       |
| Volume/Å <sup>3</sup>                                         | 934.65(5)                                                        | 581.09(3)                                                        |
| <i>Z</i>                                                      | 2                                                                | 1                                                                |
| $\rho_{\text{calc}}$ /cm <sup>3</sup>                         | 1.855                                                            | 1.555                                                            |
| $\mu$ /mm <sup>-1</sup>                                       | 13.802                                                           | 11.160                                                           |
| <i>F</i> (000)                                                | 526.0                                                            | 279.0                                                            |
| Crystal size/mm <sup>3</sup>                                  | 0.07 × 0.05 × 0.05                                               | 0.04 × 0.03 × 0.02                                               |
| Radiation                                                     | CuK $\alpha$ ( $\lambda$ = 1.54184)                              | CuK $\alpha$ ( $\lambda$ = 1.5418)                               |
| 2 $\theta$ range for data collection/°                        | 11.312 to 146.44                                                 | 8.98 to 147.562                                                  |
| Reflections collected                                         | 1961                                                             | 4761                                                             |
| Independent reflections                                       | 963 [ <i>R</i> <sub>int</sub> = 0.0284]                          | 2227 [ <i>R</i> <sub>int</sub> = 0.0252]                         |
| Data/restraints/parameters                                    | 963/0/65                                                         | 2227/0/126                                                       |
| Goodness-of-fit on <i>F</i> <sup>2</sup>                      | 1.029                                                            | 1.100                                                            |
| Final <i>R</i> indexes [ <i>I</i> >= 2 $\sigma$ ( <i>I</i> )] | <i>R</i> <sub>1</sub> = 0.0375, <i>wR</i> <sub>2</sub> = 0.1024  | <i>R</i> <sub>1</sub> = 0.0376, <i>wR</i> <sub>2</sub> = 0.0973  |
| Final <i>R</i> indexes [all data]                             | <i>R</i> <sub>1</sub> = 0.0384, <i>wR</i> <sub>2</sub> = 0.1031  | <i>R</i> <sub>1</sub> = 0.0398, <i>wR</i> <sub>2</sub> = 0.0981  |
| Largest diff. peak/hole / e Å <sup>-3</sup>                   | 0.45/-0.53                                                       | 0.33/-0.68                                                       |

$$R_1 = \frac{\sum ||F_o| - |F_c||}{\sum |F_o|}, \quad wR_2 = \left[ \frac{\sum w(F_o^2 - F_c^2)^2}{\sum w(F_o^2)^2} \right]^{1/2}$$

**Table S3** The main bond lengths of {[H<sub>2</sub>DAP]MnCl<sub>4</sub>}<sub>n</sub> (**1**) (Å)

| Bond                  | Length/Å  | Bond                  | Length/Å   |
|-----------------------|-----------|-----------------------|------------|
| Mn1-Cl1               | 2.5819(3) | Mn1- Cl1 <sup>3</sup> | 2.5819(3)  |
| Mn1- Cl1 <sup>1</sup> | 2.5819(3) | Mn1- Cl2              | 2.4880(15) |
| Mn1- Cl1 <sup>2</sup> | 2.5819(3) | Mn1- Cl2 <sup>1</sup> | 2.4880(15) |

**Table S4** The main bond angles of {[H<sub>2</sub>DAP]MnCl<sub>4</sub>}<sub>n</sub> (**1**) (°)

| Bonds                                 | Angle /°   | Bonds                                 | Angle /°  |
|---------------------------------------|------------|---------------------------------------|-----------|
| Cl1-Mn-Cl1 <sup>1</sup>               | 180.0      | Cl1 <sup>1</sup> -Mn-Cl2 <sup>1</sup> | 90.31(4)  |
| Cl1-Mn-Cl1 <sup>2</sup>               | 87.937(12) | Cl1 <sup>2</sup> -Mn-Cl1 <sup>3</sup> | 180.00(7) |
| Cl1-Mn-Cl1 <sup>3</sup>               | 92.063(12) | Cl1 <sup>2</sup> -Mn-Cl2              | 90.31(4)  |
| Cl1-Mn-Cl2                            | 90.31(4)   | Cl1 <sup>2</sup> -Mn-Cl2 <sup>1</sup> | 89.69(4)  |
| Cl1-Mn-Cl2 <sup>1</sup>               | 89.69(4)   | Cl1 <sup>3</sup> -Mn-Cl2              | 89.69(4)  |
| Cl1 <sup>1</sup> -Mn-Cl1 <sup>2</sup> | 92.062(12) | Cl1 <sup>3</sup> -Mn-Cl2 <sup>1</sup> | 90.31(4)  |
| Cl1 <sup>1</sup> -Mn-Cl1 <sup>3</sup> | 87.938(12) | Cl2-Mn-Cl2 <sup>1</sup>               | 180.0     |
| Cl1 <sup>1</sup> -Mn-Cl2              | 90.31(4)   |                                       |           |

**Table S5** The list of hydrogen bonds in {[H<sub>2</sub>DAP]MnCl<sub>4</sub>}<sub>n</sub> (**1**)

| D-H    | d(D-H) | d(H..A) | <DHA   | d(D..A) | A                |
|--------|--------|---------|--------|---------|------------------|
| N1-H1A | 0.890  | 2.456   | 173.42 | 3.342   | Cl1 <sup>1</sup> |
| N1-H1B | 0.890  | 2.913   | 127.99 | 3.531   | Cl1              |
| N1-H1B | 0.890  | 2.872   | 114.57 | 3.342   | Cl1 <sup>2</sup> |
| N1-H1B | 0.890  | 2.790   | 151.25 | 3.596   | Cl2 <sup>3</sup> |
| N1-H1C | 0.890  | 2.418   | 144.90 | 3.188   | Cl2              |

Symmetry codes: <sup>1</sup> [ -x, -y+1, -z+1 ]; <sup>2</sup> [ -x+1/2, -y+1, z+1/2 ]; <sup>3</sup> [ x+1/2, y, -z+1/2 ].



**Table S6** The main bond lengths of  $\{[(\text{H}_2\text{MELA})_2\text{MnCl}_5]\text{Cl}\}_n$  (**2**) (Å)

| Bond                  | Length/Å   | Bond                  | Length/Å   |
|-----------------------|------------|-----------------------|------------|
| Mn1-Cl1               | 2.5015(9)  | Mn1- Cl3              | 2.5797(16) |
| Mn1- Cl1 <sup>1</sup> | 2.5015(9)  | Mn1- Cl4              | 2.6226(16) |
| Mn1- Cl2              | 2.4467(16) | Mn1- Cl4 <sup>2</sup> | 2.7939(16) |

**Table S7** The main bond angles of  $\{[(\text{H}_2\text{MELA})_2\text{MnCl}_5]\text{Cl}\}_n$  (**2**) (°)

| Bonds                    | Angle /°  | Bonds                                 | Angle /°  |
|--------------------------|-----------|---------------------------------------|-----------|
| Cl1-Mn-Cl1 <sup>1</sup>  | 174.25(6) | Cl1 <sup>1</sup> -Mn-Cl4 <sup>2</sup> | 87.82(3)  |
| Cl1-Mn-Cl2               | 91.83(3)  | Cl2-Mn-Cl3                            | 173.68(6) |
| Cl1-Mn-Cl3               | 87.94(3)  | Cl2-Mn-Cl4                            | 98.81(6)  |
| Cl1-Mn-Cl4               | 91.91(3)  | Cl2-Mn-Cl4 <sup>2</sup>               | 88.77(5)  |
| Cl1-Mn-Cl4 <sup>2</sup>  | 87.82(3)  | Cl3-Mn-Cl4                            | 87.51(5)  |
| Cl1 <sup>1</sup> -Mn-Cl2 | 91.83(3)  | Cl3-Mn-Cl4 <sup>2</sup>               | 84.90(5)  |
| Cl1 <sup>1</sup> -Mn-Cl3 | 87.94(3)  | Cl4-Mn-Cl4 <sup>2</sup>               | 172.42(7) |
| Cl1 <sup>1</sup> -Mn-Cl4 | 91.91(3)  |                                       |           |

**Table S8** The list of hydrogen bonds in  $\{[(\text{H}_2\text{MELA})_2\text{MnCl}_5]\text{Cl}\}_n$  (**2**)

| D-H    | d(D-H) | d(H..A) | <DHA   | d(D..A) | A                |
|--------|--------|---------|--------|---------|------------------|
| N1-H1A | 0.860  | 2.506   | 154.38 | 3.303   | Cl4 <sup>1</sup> |
| N1-H1B | 0.860  | 2.744   | 141.16 | 3.456   | Cl1 <sup>2</sup> |
| N1-H1B | 0.860  | 2.568   | 136.68 | 3.248   | Cl1 <sup>1</sup> |
| N2-H2  | 0.860  | 2.221   | 163.67 | 3.055   | Cl1 <sup>2</sup> |
| N3-H3  | 0.860  | 2.194   | 173.57 | 3.050   | Cl3 <sup>1</sup> |
| N4-H4A | 0.860  | 2.398   | 161.32 | 3.225   | Cl5 <sup>3</sup> |
| N4-H4B | 0.860  | 2.362   | 157.83 | 3.175   | Cl2 <sup>2</sup> |
| N5-H5A | 0.860  | 2.178   | 175.56 | 3.036   | N6 <sup>1</sup>  |
| N5-H5B | 0.860  | 2.527   | 137.04 | 3.211   | Cl5 <sup>4</sup> |

Symmetry codes: <sup>1</sup> [ -x+1, y, -z+1 ]; <sup>2</sup> [ x-1, y, z ]; <sup>3</sup> [ -x, -y+1, -z ]; <sup>4</sup> [ x+1, y, z ];

**Table S9** The main bond lengths of [H<sub>2</sub>TAP]<sub>2</sub>MnCl<sub>6</sub> (**3**) (Å)

| Bond                  | Length/Å  | Bond                  | Length/Å  |
|-----------------------|-----------|-----------------------|-----------|
| Mn1-Cl1               | 2.5611(8) | Mn1- Cl2 <sup>1</sup> | 2.5686(6) |
| Mn1- Cl1 <sup>1</sup> | 2.5611(8) | Mn1- Cl2 <sup>2</sup> | 2.5686(6) |
| Mn1- Cl2              | 2.5686(6) | Mn1- Cl2 <sup>3</sup> | 2.5686(6) |

**Table S10** The main bond angles of [H<sub>2</sub>TAP]<sub>2</sub>MnCl<sub>6</sub> (**3**) (°)

| Bonds                                 | Angle /°   | Bonds                                 | Angle /°   |
|---------------------------------------|------------|---------------------------------------|------------|
| Cl1-Mn-Cl1 <sup>1</sup>               | 180.0      | Cl1 <sup>1</sup> -Mn-Cl2 <sup>3</sup> | 93.481(18) |
| Cl1-Mn-Cl2                            | 93.482(18) | Cl2-Mn-Cl2 <sup>1</sup>               | 180.0      |
| Cl1-Mn-Cl2 <sup>1</sup>               | 86.518(18) | Cl2-Mn-Cl2 <sup>2</sup>               | 91.12(3)   |
| Cl1-Mn-Cl2 <sup>2</sup>               | 93.482(18) | Cl2-Mn-Cl2 <sup>3</sup>               | 88.88(3)   |
| Cl1-Mn-Cl2 <sup>3</sup>               | 86.518(18) | Cl2 <sup>1</sup> -Mn-Cl2 <sup>2</sup> | 88.88(3)   |
| Cl1 <sup>1</sup> -Mn-Cl2              | 86.518(18) | Cl2 <sup>1</sup> -Mn-Cl2 <sup>3</sup> | 91.12(3)   |
| Cl1 <sup>1</sup> -Mn-Cl2 <sup>1</sup> | 93.481(18) | Cl2 <sup>2</sup> -Mn-Cl2 <sup>3</sup> | 180.0      |
| Cl1 <sup>1</sup> -Mn-Cl2 <sup>2</sup> | 86.519(17) |                                       |            |

**Table S11** The list of hydrogen bonds in [H<sub>2</sub>TAP]<sub>2</sub>MnCl<sub>6</sub> (**3**)

| D-H    | d(D-H) | d(H..A) | <DHA   | d(D..A) | A                |
|--------|--------|---------|--------|---------|------------------|
| N1-H1  | 0.860  | 2.984   | 140.96 | 3.692   | Cl1              |
| N1-H1  | 0.860  | 2.707   | 141.42 | 3.422   | Cl2 <sup>1</sup> |
| N2-H2A | 0.860  | 2.320   | 172.44 | 3.174   | Cl1              |
| N2-H2B | 0.860  | 2.449   | 161.30 | 3.276   | Cl2 <sup>2</sup> |
| N3-H3A | 0.860  | 2.391   | 153.69 | 3.185   | Cl2 <sup>1</sup> |
| N3-H3B | 0.860  | 2.394   | 153.07 | 3.185   | Cl2 <sup>1</sup> |
| C3-H3  | 0.930  | 2.880   | 138.11 | 3.626   | Cl2 <sub>3</sub> |
| C3-H3  | 0.930  | 2.880   | 138.11 | 3.626   | Cl2 <sub>4</sub> |

Symmetry codes: <sup>1</sup> [ -x+1, y, -z+1 ]; <sup>2</sup> [ -x+3/2, -y+1/2, -z+1/2 ]; <sup>3</sup> [ -x+3/2, -y+1/2, -z+1/2 ]; <sup>4</sup> [ -x+3/2, y-1/2, -z+1/2 ];

**Table S12** The main bond lengths of [H<sub>2</sub>MXD]<sub>2</sub>MnCl<sub>6</sub> (**4**) (Å)

| Bond                  | Length/Å  | Bond                  | Length/Å  |
|-----------------------|-----------|-----------------------|-----------|
| Mn1-Cl1               | 2.5787(4) | Mn1- Cl2 <sup>1</sup> | 2.5138(5) |
| Mn1- Cl1 <sup>1</sup> | 2.5786(4) | Mn1- Cl3              | 2.6628(5) |
| Mn1- Cl2              | 2.5138(5) | Mn1- Cl3 <sup>1</sup> | 2.6627(5) |

**Table S13** The main bond angles of [H<sub>2</sub>MXD]<sub>2</sub>MnCl<sub>6</sub> (**4**) (°)

| Bonds                                 | Angle /°   | Bonds                                 | Angle /°   |
|---------------------------------------|------------|---------------------------------------|------------|
| Cl1-Mn-Cl1 <sup>1</sup>               | 180.0      | Cl1 <sup>1</sup> -Mn-Cl3 <sup>1</sup> | 90.149(15) |
| Cl1-Mn-Cl2                            | 88.831(16) | Cl2-Mn-Cl2 <sup>1</sup>               | 180.0      |
| Cl1-Mn-Cl2 <sup>1</sup>               | 91.169(16) | Cl2-Mn-Cl3                            | 88.414(17) |
| Cl1-Mn-Cl3                            | 90.149(15) | Cl2-Mn-Cl3 <sup>1</sup>               | 91.587(17) |
| Cl1-Mn-Cl3 <sup>1</sup>               | 89.852(15) | Cl2 <sup>1</sup> -Mn-Cl3              | 91.586(17) |
| Cl1 <sup>1</sup> -Mn-Cl2              | 91.168(16) | Cl2 <sup>1</sup> -Mn-Cl3 <sup>1</sup> | 88.413(17) |
| Cl1 <sup>1</sup> -Mn-Cl2 <sup>1</sup> | 88.832(16) | Cl3-Mn-Cl3 <sup>1</sup>               | 180.0      |
| Cl1 <sup>1</sup> -Mn-Cl3              | 89.851(15) |                                       |            |

**Table S14** The list of hydrogen bonds in [H<sub>2</sub>MXD]<sub>2</sub>MnCl<sub>6</sub> (**4**)

| D-H    | d(D-H) | d(H..A) | <DHA   | d(D..A) | A                |
|--------|--------|---------|--------|---------|------------------|
| N1-H1A | 0.890  | 2.557   | 126.78 | 3.171   | Cl1              |
| N1-H1A | 0.890  | 2.728   | 136.04 | 3.425   | Cl3 <sup>1</sup> |
| N1-H1B | 0.890  | 2.835   | 113.86 | 3.297   | Cl1 <sup>2</sup> |
| N1-H1B | 0.890  | 2.418   | 149.6  | 3.218   | Cl2 <sup>1</sup> |
| N1-H1C | 0.890  | 2.391   | 164.41 | 3.257   | Cl3 <sup>3</sup> |
| N2-H2A | 0.890  | 2.72    | 122.01 | 3.28    | Cl1 <sup>4</sup> |
| N2-H2A | 0.890  | 2.439   | 150.73 | 3.245   | Cl2 <sup>4</sup> |
| N2-H2B | 0.890  | 2.413   | 155.96 | 3.246   | Cl1 <sup>5</sup> |
| N2-H2C | 0.890  | 2.585   | 136    | 3.284   | Cl3 <sup>6</sup> |
| N2-H2C | 0.890  | 2.917   | 114.56 | 3.385   | Cl3 <sup>4</sup> |

Symmetry codes: <sup>1</sup> [ x+1, y, z ]; <sup>2</sup> [ -x+1, -y+1, -z ]; <sup>3</sup> [ -x, -y+1, -z ]; <sup>4</sup> [ -x+1, -y+1, -z+1 ]; <sup>5</sup> [ x+1, y+1, z+1 ]; <sup>6</sup> [ x+2, y+1, z+1 ]
